# Supplementary material for: The Effect of Visfatin on the Functioning of the Porcine Pituitary Gland: An In Vitro Study
Source: MDPI journal article supplement (doi:10.3390/cells12242835), 2023-12-14
Supplement: s1 [file s1]

**Supplementary Table S1.** The main factors and the interactions of these factors affecting the secretion of LH by the porcine anterior pituitary cells during the estrous cycle (the results of multifactorial analysis of variance)

|                |                 | FACTORS                                   | F                     | <i>p</i> |
|----------------|-----------------|-------------------------------------------|-----------------------|----------|
| Expt.<br>No. 1 | LH<br>secretion | PHASE                                     | $F_{3,512} = 2719.20$ | 0.00000  |
|                |                 | STIMULATION OF CELLS                      | $F_{3,512} = 353.60$  | 0.00000  |
|                |                 | VIS DOSE                                  | $F_{3,512} = 2.70$    | 0.04245  |
|                |                 | FK866                                     | $F_{1,512} = 0.20$    | 0.62472  |
|                |                 | PHASE*STIMULATION OF CELLS                | $F_{9,512} = 105.00$  | 0.00000  |
|                |                 | PHASE*VIS DOSE                            | $F_{9,512} = 12.90$   | 0.00000  |
|                |                 | STIMULATION OF CELLS*VIS DOSE             | $F_{9,512} = 23.90$   | 0.00000  |
|                |                 | PHASE*FK866                               | $F_{3,512} = 138.90$  | 0.00000  |
|                |                 | STIMULATION OF CELLS*FK866                | $F_{3,512} = 120.70$  | 0.00000  |
|                |                 | VIS DOSE*FK866                            | $F_{3,512} = 1.60$    | 0.18921  |
|                |                 | PHASE*STIMULATION OF CELLS*VIS DOSE       | $F_{27,512} = 9.70$   | 0.00000  |
|                |                 | PHASE*STIMULATION OF CELLS*FK866          | $F_{9,512} = 32.00$   | 0.00000  |
|                |                 | PHASE*VIS DOSE*FK866                      | $F_{9,512} = 17.30$   | 0.00000  |
|                |                 | STIMULATION OF CELLS*VIS DOSE*FK866       | $F_{9,512} = 18.50$   | 0.00000  |
|                |                 | PHASE*STIMULATION OF CELLS*VIS DOSE*FK866 | $F_{27,512} = 6.50$   | 0.00000  |

**Supplementary Table S2.** The main factors and the interactions of these factors affecting the secretion of LH by the porcine anterior pituitary cells during the estrous cycle (the results of two-way analysis of variance)

|                              |                             | PHASE<br>OF THE ESTROUS<br>CYCLE | FACTORS            | F                          | <i>p</i>                   |         |
|------------------------------|-----------------------------|----------------------------------|--------------------|----------------------------|----------------------------|---------|
| <i>Expt.</i><br><i>No. 1</i> | LH                          | basal<br>secretion               | early-luteal phase | VIS                        | F <sub>3,32</sub> = 8.67   | 0.00024 |
|                              |                             |                                  | early-luteal phase | FK866                      | F <sub>1,32</sub> = 22.06  | 0.00005 |
|                              |                             |                                  | early-luteal phase | VIS*FK866                  | F <sub>3,32</sub> = 5.33   | 0.00431 |
|                              |                             |                                  | mid-luteal phase   | VIS                        | F <sub>3,32</sub> = 6.64   | 0.00129 |
|                              |                             |                                  | mid-luteal phase   | FK866                      | F <sub>1,32</sub> = 34.48  | 0.00000 |
|                              |                             |                                  | mid-luteal phase   | VIS*FK866                  | F <sub>3,32</sub> = 8.09   | 0.00038 |
|                              |                             |                                  | late-luteal phase  | VIS                        | F <sub>3,32</sub> = 2.18   | 0.10974 |
|                              |                             |                                  | late-luteal phase  | FK866                      | F <sub>1,32</sub> = 14.53  | 0.00059 |
|                              |                             |                                  | late-luteal phase  | VIS*FK866                  | F <sub>3,32</sub> = 2.74   | 0.05957 |
|                              |                             | follicular phase                 | VIS                | F <sub>3,32</sub> = 7.03   | 0.00092                    |         |
|                              |                             | follicular phase                 | FK866              | F <sub>1,32</sub> = 71.84  | 0.00000                    |         |
|                              |                             | follicular phase                 | VIS*FK866          | F <sub>3,32</sub> = 8.99   | 0.00018                    |         |
|                              |                             | GnRH-simulated<br>secretion      | early-luteal phase | VIS                        | F <sub>3,32</sub> = 39.26  | 0.00000 |
|                              |                             |                                  | early-luteal phase | FK866                      | F <sub>1,32</sub> = 180.39 | 0.00000 |
|                              |                             |                                  | early-luteal phase | VIS*FK866                  | F <sub>3,32</sub> = 19.68  | 0.00000 |
|                              |                             |                                  | mid-luteal phase   | VIS                        | F <sub>3,32</sub> = 13.12  | 0.00001 |
|                              |                             |                                  | mid-luteal phase   | FK866                      | F <sub>1,32</sub> = 14.61  | 0.00058 |
|                              |                             |                                  | mid-luteal phase   | VIS*FK866                  | F <sub>3,32</sub> = 6.63   | 0.00131 |
|                              | late-luteal phase           |                                  | VIS                | F <sub>3,32</sub> = 13.87  | 0.00001                    |         |
|                              | late-luteal phase           |                                  | FK866              | F <sub>1,32</sub> = 95.55  | 0.00000                    |         |
|                              | late-luteal phase           |                                  | VIS*FK866          | F <sub>3,32</sub> = 11.41  | 0.00003                    |         |
|                              | follicular phase            |                                  | VIS                | F <sub>3,32</sub> = 6.57   | 0.00138                    |         |
|                              | follicular phase            |                                  | FK866              | F <sub>1,32</sub> = 66.49  | 0.00000                    |         |
|                              | follicular phase            |                                  | VIS*FK866          | F <sub>3,32</sub> = 9.20   | 0.00016                    |         |
|                              | INS-stimulated<br>secretion |                                  | early-luteal phase | VIS                        | F <sub>3,32</sub> = 6.95   | 0.00099 |
|                              |                             |                                  | early-luteal phase | FK866                      | F <sub>1,32</sub> = 27.21  | 0.00001 |
|                              |                             |                                  | early-luteal phase | VIS*FK866                  | F <sub>3,32</sub> = 6.98   | 0.00096 |
|                              |                             |                                  | mid-luteal phase   | VIS                        | F <sub>3,32</sub> = 6.59   | 0.00135 |
|                              |                             |                                  | mid-luteal phase   | FK866                      | F <sub>1,32</sub> = 24.86  | 0.00002 |
|                              |                             |                                  | mid-luteal phase   | VIS*FK866                  | F <sub>3,32</sub> = 8.87   | 0.00020 |
|                              |                             | late-luteal phase                | VIS                | F <sub>3,32</sub> = 3.78   | 0.01980                    |         |
|                              |                             | late-luteal phase                | FK866              | F <sub>1,32</sub> = 11.74  | 0.00170                    |         |
|                              |                             | late-luteal phase                | VIS*FK866          | F <sub>3,32</sub> = 4.56   | 0.00907                    |         |
|                              |                             | follicular phase                 | VIS                | F <sub>3,32</sub> = 10.80  | 0.00005                    |         |
|                              |                             | follicular phase                 | FK866              | F <sub>1,32</sub> = 111.97 | 0.00000                    |         |
|                              |                             | follicular phase                 | VIS*FK866          | F <sub>3,32</sub> = 16.08  | 0.00000                    |         |
|                              |                             | GnRH+INS-stimulated<br>secretion | early-luteal phase | VIS                        | F <sub>3,32</sub> = 15.51  | 0.00000 |
|                              |                             |                                  | early-luteal phase | FK866                      | F <sub>1,32</sub> = 97.86  | 0.00000 |
|                              |                             |                                  | early-luteal phase | VIS*FK866                  | F <sub>3,32</sub> = 14.61  | 0.00000 |
|                              |                             |                                  | mid-luteal phase   | VIS                        | F <sub>3,32</sub> = 15.11  | 0.00000 |
|                              |                             |                                  | mid-luteal phase   | FK866                      | F <sub>1,32</sub> = 98.02  | 0.00000 |
|                              |                             |                                  | mid-luteal phase   | VIS*FK866                  | F <sub>3,32</sub> = 12.54  | 0.00001 |
|                              | late-luteal phase           |                                  | VIS                | F <sub>3,32</sub> = 5.84   | 0.00268                    |         |
|                              | late-luteal phase           |                                  | FK866              | F <sub>1,32</sub> = 24.30  | 0.00002                    |         |
|                              | late-luteal phase           |                                  | VIS*FK866          | F <sub>3,32</sub> = 3.63   | 0.02315                    |         |
|                              | follicular phase            |                                  | VIS                | F <sub>3,32</sub> = 22.60  | 0.00000                    |         |
|                              | follicular phase            |                                  | FK866              | F <sub>1,32</sub> = 137.49 | 0.00000                    |         |
|                              | follicular phase            |                                  | VIS*FK866          | F <sub>3,32</sub> = 23.28  | 0.00000                    |         |

**Supplementary Table S3.** The main factors and the interactions of these factors affecting the secretion of FSH by the porcine anterior pituitary cells during the estrous cycle (the results of multifactorial analysis of variance)

|                |                  | FACTORS                                   | F                     | <i>p</i> |
|----------------|------------------|-------------------------------------------|-----------------------|----------|
| Expt.<br>No. 1 | FSH<br>secretion | PHASE                                     | $F_{3,512} = 1630.39$ | 0.00000  |
|                |                  | STIMULATION OF CELLS                      | $F_{3,512} = 139.91$  | 0.00000  |
|                |                  | VIS DOSE                                  | $F_{3,512} = 34.66$   | 0.00000  |
|                |                  | FK866                                     | $F_{1,512} = 0.29$    | 0.83584  |
|                |                  | PHASE*STIMULATION OF CELLS                | $F_{9,512} = 7.93$    | 0.00000  |
|                |                  | PHASE*VIS DOSE                            | $F_{9,512} = 76.69$   | 0.00000  |
|                |                  | STIMULATION OF CELLS*VIS DOSE             | $F_{9,512} = 9.66$    | 0.00000  |
|                |                  | PHASE*FK866                               | $F_{3,512} = 0.17$    | 0.99705  |
|                |                  | STIMULATION OF CELLS*FK866                | $F_{3,512} = 0.13$    | 0.94042  |
|                |                  | VIS DOSE*FK866                            | $F_{3,512} = 1.10$    | 0.34832  |
|                |                  | PHASE*STIMULATION OF CELLS*VIS DOSE       | $F_{27,512} = 10.73$  | 0.00000  |
|                |                  | PHASE*STIMULATION OF CELLS*FK866          | $F_{9,512} = 0.98$    | 0.45427  |
|                |                  | PHASE*VIS DOSE*FK866                      | $F_{9,512} = 0.32$    | 0.99969  |
|                |                  | STIMULATION OF CELLS*VIS DOSE*FK866       | $F_{9,512} = 0.06$    | 0.99995  |
|                |                  | PHASE*STIMULATION OF CELLS*VIS DOSE*FK866 | $F_{27,512} = 0.21$   | 1.00000  |

**Supplementary Table S4.** The main factors and the interactions of these factors affecting the secretion of FSH by the porcine anterior pituitary cells during the estrous cycle (the results of two-way analysis of variance)

|                |                                  | PHASE<br>OF THE ESTROUS<br>CYCLE | FACTORS   | F                         | p       |
|----------------|----------------------------------|----------------------------------|-----------|---------------------------|---------|
| Expt.<br>No. 1 | FSH                              | early-luteal phase               | VIS       | F <sub>3,32</sub> = 5.04  | 0.00569 |
|                |                                  |                                  | FK866     | F <sub>1,32</sub> = 5.82  | 0.02176 |
|                |                                  |                                  | VIS*FK866 | F <sub>3,32</sub> = 3.36  | 0.03076 |
|                |                                  | mid-luteal phase                 | VIS       | F <sub>3,32</sub> = 2.19  | 0.10853 |
|                |                                  |                                  | FK866     | F <sub>1,32</sub> = 0.02  | 0.88447 |
|                |                                  |                                  | VIS*FK866 | F <sub>3,32</sub> = 1.12  | 0.35613 |
|                |                                  | late-luteal phase                | VIS       | F <sub>3,32</sub> = 0.37  | 0.77751 |
|                |                                  |                                  | FK866     | F <sub>1,32</sub> = 0.48  | 0.49168 |
|                |                                  |                                  | VIS*FK866 | F <sub>3,32</sub> = 0.25  | 0.85770 |
|                | GnRH-simulated<br>secretion      | follicular phase                 | VIS       | F <sub>3,32</sub> = 39.11 | 0.00000 |
|                |                                  |                                  | FK866     | F <sub>1,32</sub> = 2.16  | 0.11170 |
|                |                                  |                                  | VIS*FK866 | F <sub>3,32</sub> = 4.00  | 0.01582 |
|                |                                  | early-luteal phase               | VIS       | F <sub>3,32</sub> = 1.72  | 0.18299 |
|                |                                  |                                  | FK866     | F <sub>1,32</sub> = 1.70  | 0.20181 |
|                |                                  |                                  | VIS*FK866 | F <sub>3,32</sub> = 1.04  | 0.38658 |
|                |                                  | mid-luteal phase                 | VIS       | F <sub>3,32</sub> = 1.21  | 0.32047 |
|                |                                  |                                  | FK866     | F <sub>1,32</sub> = 2.31  | 0.13801 |
|                |                                  |                                  | VIS*FK866 | F <sub>3,32</sub> = 1.38  | 0.26540 |
|                |                                  | late-luteal phase                | VIS       | F <sub>3,32</sub> = 0.21  | 0.88617 |
|                |                                  |                                  | FK866     | F <sub>1,32</sub> = 0.46  | 0.50350 |
|                |                                  |                                  | VIS*FK866 | F <sub>3,32</sub> = 0.04  | 0.99097 |
|                | INS-stimulated secretion         | follicular phase                 | VIS       | F <sub>3,32</sub> = 20.77 | 0.00007 |
|                |                                  |                                  | FK866     | F <sub>1,32</sub> = 2.49  | 0.07774 |
|                |                                  |                                  | VIS*FK866 | F <sub>3,32</sub> = 3.02  | 0.04396 |
|                |                                  | early-luteal phase               | VIS       | F <sub>3,32</sub> = 4.82  | 0.03550 |
|                |                                  |                                  | FK866     | F <sub>1,32</sub> = 0.44  | 0.72388 |
|                |                                  |                                  | VIS*FK866 | F <sub>3,32</sub> = 0.72  | 0.54750 |
|                |                                  | mid-luteal phase                 | VIS       | F <sub>3,32</sub> = 1.60  | 0.20766 |
|                |                                  |                                  | FK866     | F <sub>1,32</sub> = 2.30  | 0.13900 |
|                |                                  |                                  | VIS*FK866 | F <sub>3,32</sub> = 1.11  | 0.36042 |
|                |                                  | late-luteal phase                | VIS       | F <sub>3,32</sub> = 6.88  | 0.01327 |
|                |                                  |                                  | FK866     | F <sub>1,32</sub> = 0.07  | 0.97788 |
|                |                                  |                                  | VIS*FK866 | F <sub>3,32</sub> = 0.19  | 0.90072 |
|                | GnRH+INS-stimulated<br>secretion | follicular phase                 | VIS       | F <sub>3,32</sub> = 16.41 | 0.00030 |
|                |                                  |                                  | FK866     | F <sub>1,32</sub> = 1.58  | 0.21248 |
|                |                                  |                                  | VIS*FK866 | F <sub>3,32</sub> = 1.29  | 0.29609 |
|                |                                  | early-luteal phase               | VIS       | F <sub>3,32</sub> = 15.45 | 0.00043 |
|                |                                  |                                  | FK866     | F <sub>1,32</sub> = 1.86  | 0.15617 |
|                |                                  |                                  | VIS*FK866 | F <sub>3,32</sub> = 2.42  | 0.08469 |
|                |                                  | mid-luteal phase                 | VIS       | F <sub>3,32</sub> = 2.41  | 0.08388 |
|                |                                  |                                  | FK866     | F <sub>1,32</sub> = 0.71  | 0.40725 |
|                |                                  |                                  | VIS*FK866 | F <sub>3,32</sub> = 1.37  | 0.27029 |
|                |                                  | late-luteal phase                | VIS       | F <sub>3,32</sub> = 0.15  | 0.92881 |
|                |                                  |                                  | FK866     | F <sub>1,32</sub> = 3.73  | 0.06243 |
|                |                                  |                                  | VIS*FK866 | F <sub>3,32</sub> = 0.02  | 0.99665 |
|                |                                  | follicular phase                 | VIS       | F <sub>3,32</sub> = 4.05  | 0.01509 |
|                |                                  |                                  | FK866     | F <sub>1,32</sub> = 34.60 | 0.00000 |
|                |                                  |                                  | VIS*FK866 | F <sub>3,32</sub> = 4.21  | 0.01289 |

**Supplementary Table S5.** The main factors and the interactions of these factors affecting the proliferation of the porcine anterior pituitary cells during the estrous cycle (the results of multifactorial analysis of variance)

|                              | FACTORS              | F                          | <i>p</i> |
|------------------------------|----------------------|----------------------------|----------|
| <i>Expt.</i><br><i>No. 2</i> | PHASE                | F <sub>3,128</sub> = 9.90  | 0,00001  |
|                              | VIS DOSE             | F <sub>3,128</sub> = 68.60 | 0,00000  |
|                              | FK866                | F <sub>1,128</sub> = 2.00  | 0,11893  |
|                              | PHASE*VIS DOSE       | F <sub>9,128</sub> = 6.60  | 0,00035  |
|                              | PHASE*FK866          | F <sub>3,128</sub> = 0.70  | 0,57493  |
|                              | VIS DOSE*FK866       | F <sub>3,128</sub> = 0.10  | 0,99953  |
|                              | PHASE*VIS DOSE*FK866 | F <sub>9,128</sub> = 0.10  | 0,99974  |

**Supplementary Table S6.** The main factors and the interactions of these factors affecting the proliferation of the porcine anterior pituitary cells during the estrous cycle (the results of two-way analysis of variance)

| PHASE<br>OF THE ESTROUS<br>CYCLE |                   | FACTORS   | F                  | <i>p</i> |
|----------------------------------|-------------------|-----------|--------------------|----------|
| early-luteal phase               |                   | VIS       | $F_{3,32} = 22.27$ | 0.00005  |
|                                  |                   | FK866     | $F_{1,32} = 2.26$  | 0.10066  |
|                                  |                   | VIS*FK866 | $F_{3,32} = 2.25$  | 0.10021  |
| <i>Expt.</i><br><i>No. 2</i>     | mid-luteal phase  | VIS       | $F_{3,32} = 14.37$ | 0.00063  |
|                                  |                   | FK866     | $F_{1,32} = 2.23$  | 0.10321  |
|                                  |                   | VIS*FK866 | $F_{3,32} = 1.66$  | 0.19497  |
|                                  | late-luteal phase | VIS       | $F_{3,32} = 10.54$ | 0.00274  |
|                                  |                   | FK866     | $F_{1,32} = 2.57$  | 0.07150  |
|                                  |                   | VIS*FK866 | $F_{3,32} = 1.19$  | 0.33033  |
| follicular phase                 |                   | VIS       | $F_{3,32} = 23.54$ | 0.00003  |
|                                  |                   | FK866     | $F_{1,32} = 2.35$  | 0.30809  |
|                                  |                   | VIS*FK866 | $F_{3,32} = 1.68$  | 0.19134  |

**Supplementary Table S7.** The main factors and the interactions of these factors affecting the apoptosis process in the porcine anterior pituitary cells (the results of two-way analysis of variance)

| APOPTOSIS       |  | FACTORS   | F                 | <i>p</i> |
|-----------------|--|-----------|-------------------|----------|
| the early phase |  | VIS       | $F_{3,32} = 0.28$ | 0.83850  |
|                 |  | FK866     | $F_{1,32} = 0.08$ | 0.78116  |
|                 |  | VIS*FK866 | $F_{3,32} = 1.63$ | 0.20123  |
| the late phase  |  | VIS       | $F_{3,32} = 0.10$ | 0.96014  |
|                 |  | FK866     | $F_{1,32} = 0.14$ | 0.70632  |
|                 |  | VIS*FK866 | $F_{3,32} = 1.38$ | 0.26741  |
| total apoptosis |  | VIS       | $F_{3,32} = 0.18$ | 0.91039  |
|                 |  | FK866     | $F_{1,32} = 0.11$ | 0.73936  |
|                 |  | VIS*FK866 | $F_{3,32} = 1.56$ | 0.21742  |
| dead cells      |  | VIS       | $F_{3,32} = 0.11$ | 0.95533  |
|                 |  | FK866     | $F_{1,32} = 0.80$ | 0.37754  |
|                 |  | VIS*FK866 | $F_{3,32} = 0.02$ | 0.99709  |

**Supplementary Table S8.** The main factors and the interactions of these factors affecting LH secretion by the porcine anterior pituitary cells after treatment with inhibitors of the INSR, AKT/PI3K, MAPK/ERK1/2, and AMPK signaling pathways (the results of multifactorial analysis of variance)

|                              |                 | FACTORS      | F                 | P       |
|------------------------------|-----------------|--------------|-------------------|---------|
| <i>Expt.</i><br><i>No. 5</i> | LH<br>secretion | VIS          | $F_{1,39} = 1.27$ | 0.26687 |
|                              |                 | S961         | $F_{1,39} = 0.61$ | 0.43938 |
|                              |                 | S961*VIS     | $F_{3,39} = 0.09$ | 0.76708 |
|                              |                 | LY294002     | $F_{1,39} = 0.44$ | 0.51135 |
|                              |                 | LY294002*VIS | $F_{3,39} = 0.07$ | 0.79725 |
|                              |                 | U0126        | $F_{1,39} = 0.83$ | 0.48781 |
|                              |                 | U0126*VIS    | $F_{1,39} = 0.78$ | 0.51453 |
|                              |                 | DMPH         | $F_{3,39} = 0.58$ | 0.63023 |
|                              |                 | DMPH*VIS     | $F_{3,39} = 0.69$ | 0.56392 |



**Supplementary Table S9.** The main factors and the interactions of these factors affecting FSH secretion by the porcine anterior pituitary cells after treatment with inhibitors of the INSR, AKT/PI3K, MAPK/ERK1/2, and AMPK signaling pathways (the results of multifactorial analysis of variance)

|                              |                  | FACTORS      | F                        | <i>p</i> |
|------------------------------|------------------|--------------|--------------------------|----------|
| <i>Expt.</i><br><i>No. 5</i> | FSH<br>secretion | VIS          | F <sub>1,39</sub> = 4.93 | 0.03218  |
|                              |                  | S961         | F <sub>1,39</sub> = 3.74 | 0.06011  |
|                              |                  | S961*VIS     | F <sub>3,39</sub> = 5.07 | 0.00455  |
|                              |                  | LY294002     | F <sub>1,39</sub> = 0.33 | 0.57180  |
|                              |                  | LY294002*VIS | F <sub>3,39</sub> = 2.80 | 0.05236  |
|                              |                  | U0126        | F <sub>1,39</sub> = 0.04 | 0.83670  |
|                              |                  | U0126*VIS    | F <sub>3,39</sub> = 4.30 | 0.04457  |
|                              |                  | DMPH         | F <sub>1,39</sub> = 2.46 | 0.07677  |
|                              |                  | DMPH*VIS     | F <sub>3,39</sub> = 4.93 | 0.00522  |

The purity of the anterior lobe collection is assured by the fact that the anterior and posterior lobes of the porcine pituitary are morphologically distinct tissues, as confirmed by microscopic examination:

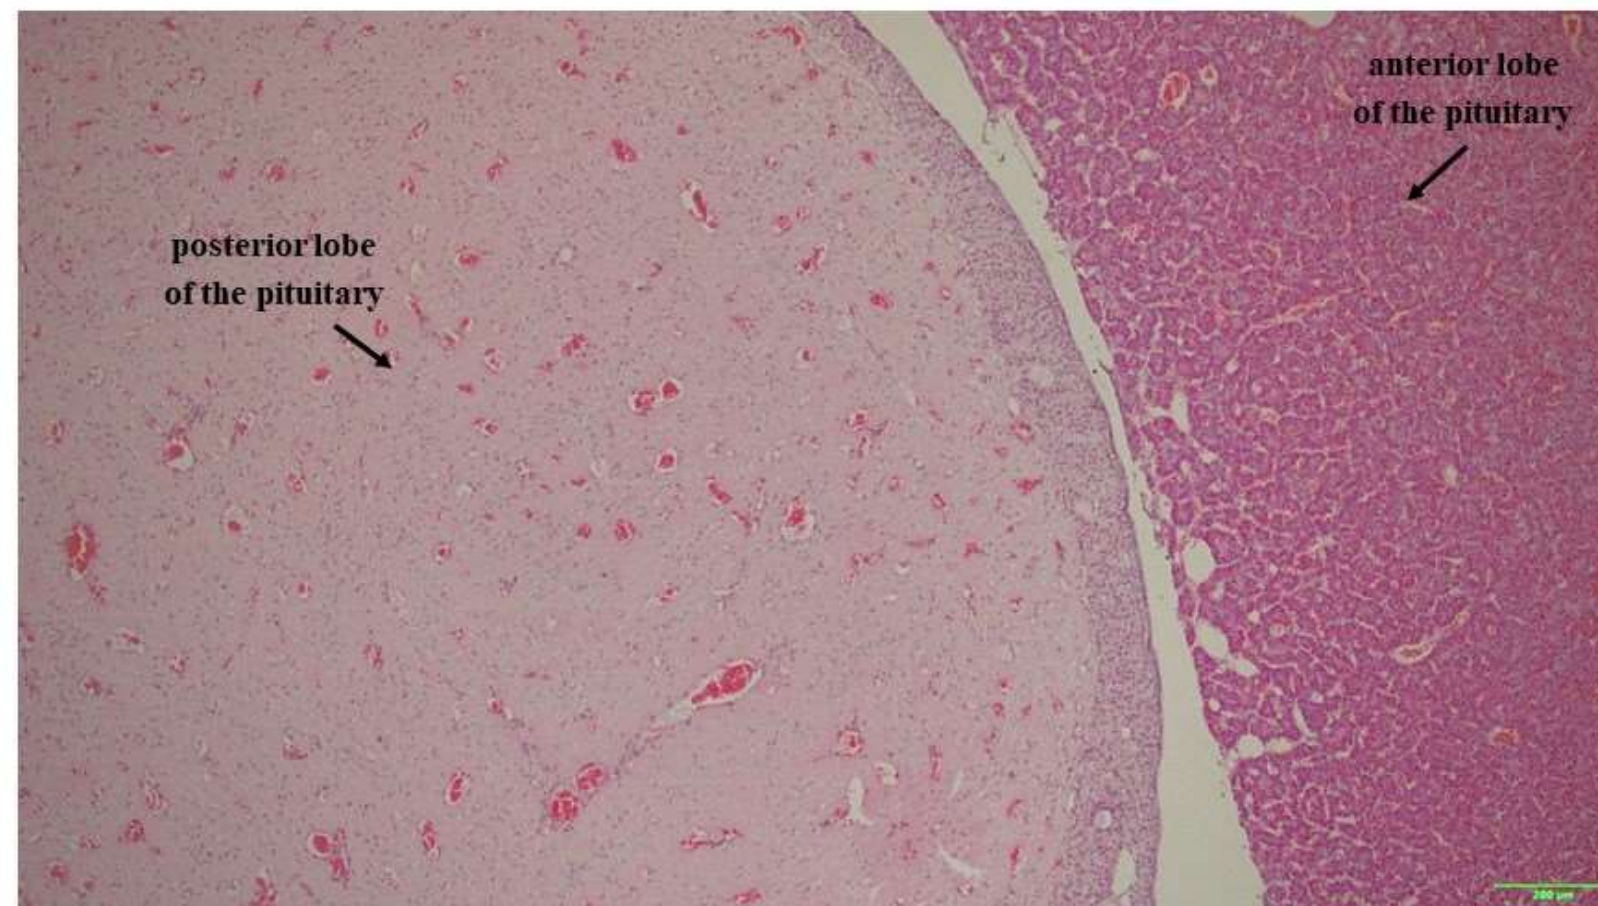

Figure shows the anterior and posterior lobes of the normal pituitary gland of the pig, x4.  
**Supplementary Figure S1.** H&E staining of anterior and posterior pituitary.

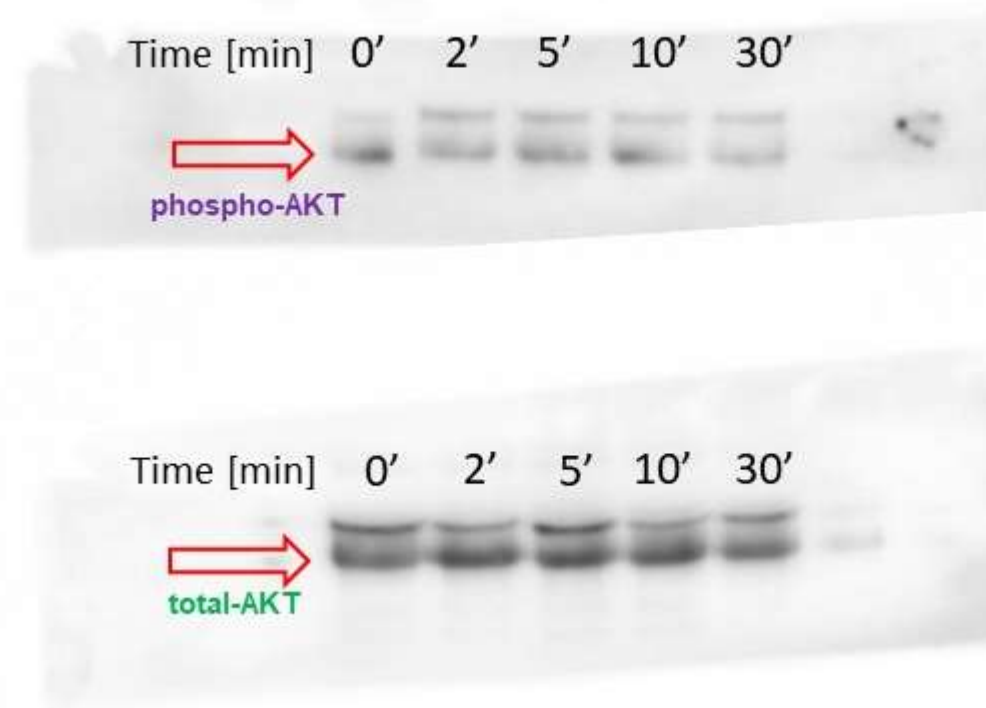

**Supplementary Figure S2.** The in vitro effect of visfatin on the activation of the AKT/PI3K signalling pathways in the porcine anterior pituitary cells.

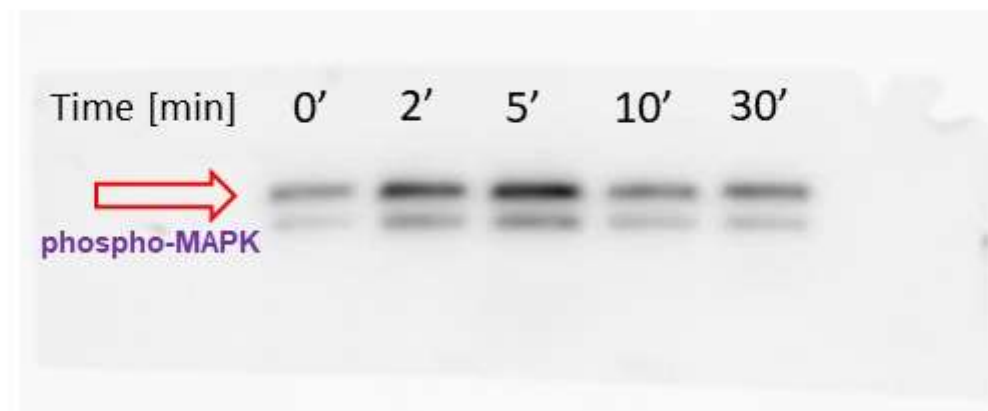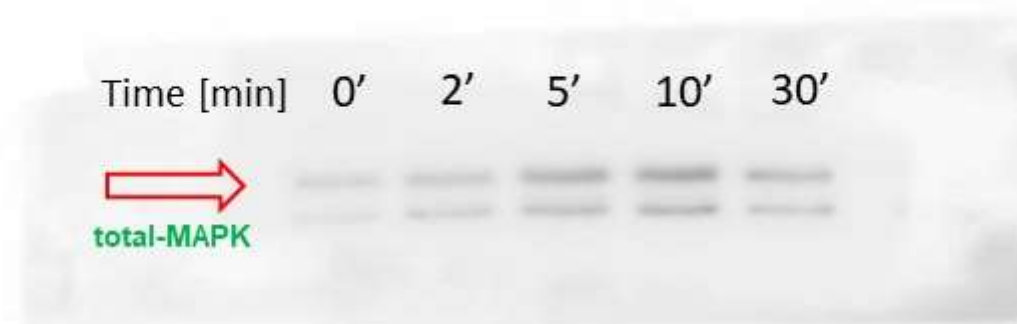

**Supplementary Figure S3.** The in vitro effect of visfatin on the activation of the MAPK/ERK1/2 signalling pathways in the porcine anterior pituitary cells.

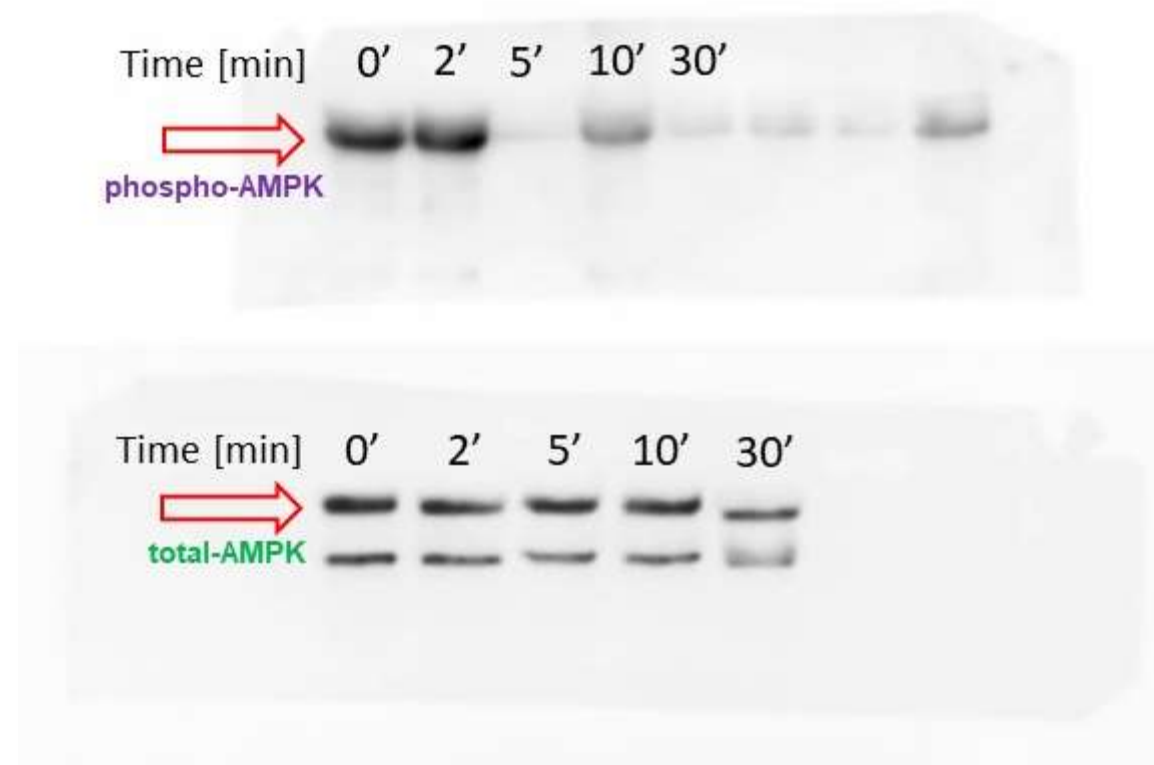

**Supplementary Figure S4.** The in vitro effect of visfatin on the activation of the AMPK signalling pathways in the porcine anterior pituitary cells.
